# Supplementary material
Source: PubMed Central journal article supplement (PMC3241821)
Supplement: 1113050108_pnas.201113050SI.pdf [file 1113050108_pnas.201113050SI.pdf]

# Supporting Information

von Cramon-Taubadel 10.1073/pnas.1113050108

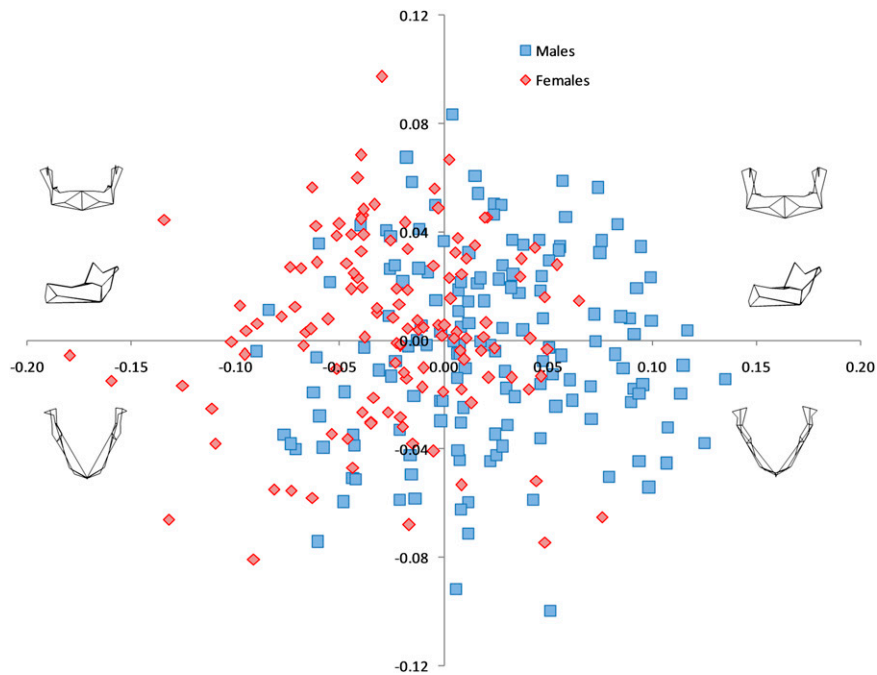

**Fig. S1.** Analysis of sexual dimorphism. PCA of form (rescaled Procrustes variables). Shape changes on PC1 (34.8% variance explained) associated with changes in isometric scaling are shown via the average wireframes at the ends of PC1. Males and females are significantly different on PC1 ( $P < 0.0001$ ). The shape changes associated with male sexual dimorphism are a more flared and angled gonial region, a more pronounced chin (pogonion), and a steeper and more upright corpus.



**Table S1. Classical marker frequency data for the 11 populations sampled\***

| Loci            | <i>ABO</i> |          |          | <i>HLA-A</i> |      |      |      |      |      |      |      |      |      |      |      |      |      |      |      | <i>HLA-B</i> |      |      |      |  |
|-----------------|------------|----------|----------|--------------|------|------|------|------|------|------|------|------|------|------|------|------|------|------|------|--------------|------|------|------|--|
|                 | <i>A</i>   | <i>B</i> | <i>O</i> | 1            | 2    | 3    | 9    | 10   | 11   | 19   | 23   | 24   | 25   | 26   | 28   | 29   | 30   | 31   | 32   | 33           | 5    | 7    | 8    |  |
| Alaskan         | 0.39       | 0.10     | 0.51     | 0.01         | 0.13 | 0.00 | 0.68 | 0.00 | 0.00 | 0.05 | 0.00 | 0.20 | 0.00 | 0.00 | 0.14 | 0.00 | 0.00 | 0.04 | 0.00 | 0.01         | 0.13 | 0.01 | 0.01 |  |
| Australian      | 0.28       | 0.00     | 0.72     | 0.00         | 0.17 | 0.00 | 0.25 | 0.34 | 0.00 | 0.00 | 0.00 | 0.00 | 0.00 | 0.00 | 0.00 | 0.00 | 0.00 | 0.00 | 0.00 | 0.00         | 0.00 | 0.00 | 0.00 |  |
| Chinese         | 0.21       | 0.19     | 0.60     | 0.02         | 0.31 | 0.02 | 0.19 | 0.02 | 0.03 | 0.16 | 0.00 | 0.19 | 0.00 | 0.02 | 0.00 | 0.01 | 0.03 | 0.03 | 0.01 | 0.05         | 0.08 | 0.02 | 0.01 |  |
| Greenland       | 0.29       | 0.06     | 0.65     | 0.03         | 0.20 | 0.02 | 0.59 | 0.01 | 0.02 | 0.12 | 0.00 | 0.00 | 0.00 | 0.12 | 0.00 | 0.00 | 0.00 | 0.00 | 0.00 | 0.11         | 0.02 | 0.02 |      |  |
| Hawikuh         | 0.09       | 0.00     | 0.91     | 0.00         | 0.50 | 0.01 | 0.36 | 0.00 | 0.00 | 0.08 | 0.00 | 0.36 | 0.00 | 0.00 | 0.00 | 0.00 | 0.04 | 0.00 | 0.04 | 0.08         | 0.01 | 0.00 |      |  |
| Ibo             | 0.13       | 0.13     | 0.74     | 0.02         | 0.15 | 0.10 | 0.10 | 0.01 | 0.00 | 0.35 | 0.10 | 0.00 | 0.00 | 0.01 | 0.10 | 0.03 | 0.11 | 0.04 | 0.01 | 0.13         | 0.02 | 0.07 | 0.00 |  |
| Italian         | 0.26       | 0.07     | 0.67     | 0.13         | 0.26 | 0.13 | 0.13 | 0.07 | 0.07 | 0.07 | 0.01 | 0.06 | 0.01 | 0.03 | 0.04 | 0.03 | 0.01 | 0.01 | 0.04 | 0.01         | 0.12 | 0.06 | 0.07 |  |
| Japanese        | 0.28       | 0.18     | 0.54     | 0.00         | 0.21 | 0.00 | 0.42 | 0.13 | 0.04 | 0.06 | 0.00 | 0.00 | 0.00 | 0.00 | 0.00 | 0.00 | 0.00 | 0.07 | 0.00 | 0.26         | 0.04 | 0.03 |      |  |
| Mongolian       | 0.17       | 0.23     | 0.10     | 0.29         | 0.08 | 0.31 | 0.03 | 0.06 | 0.05 | 0.00 | 0.00 | 0.00 | 0.00 | 0.02 | 0.00 | 0.00 | 0.00 | 0.00 | 0.00 | 0.11         | 0.07 | 0.03 |      |  |
| Central African | 0.19       | 0.13     | 0.68     | 0.00         | 0.13 | 0.10 | 0.13 | 0.05 | 0.00 | 0.19 | 0.00 | 0.00 | 0.00 | 0.04 | 0.05 | 0.06 | 0.01 | 0.01 | 0.02 | 0.03         | 0.05 | 0.02 |      |  |
| San             | 0.19       | 0.05     | 0.76     | 0.05         | 0.15 | 0.05 | 0.17 | 0.02 | 0.00 | 0.43 | 0.06 | 0.11 | 0.02 | 0.00 | 0.08 | 0.06 | 0.14 | 0.06 | 0.10 | 0.07         | 0.09 | 0.11 | 0.04 |  |

  

| Loci            | <i>HLA-B</i> |      |      |      |      |      |      |      |      |      |      |      |      |      |      |      |      |      |      |      |      |  |
|-----------------|--------------|------|------|------|------|------|------|------|------|------|------|------|------|------|------|------|------|------|------|------|------|--|
|                 | 12           | 13   | 14   | 15   | 16   | 17   | 18   | 21   | 22   | 27   | 35   | 37   | 38   | 39   | 40   | 41   | 44   | 49   | 51   | 62   | 63   |  |
| Alaskan         | 0.00         | 0.00 | 0.00 | 0.14 | 0.00 | 0.00 | 0.00 | 0.00 | 0.00 | 0.13 | 0.12 | 0.00 | 0.00 | 0.00 | 0.35 | 0.00 | 0.00 | 0.00 | 0.05 | 0.13 | 0.01 |  |
| Australian      | 0.00         | 0.07 | 0.00 | 0.07 | 0.00 | 0.00 | 0.00 | 0.00 | 0.20 | 0.00 | 0.00 | 0.00 | 0.00 | 0.00 | 0.46 | 0.00 | 0.00 | 0.00 | 0.00 | 0.00 | 0.00 |  |
| Chinese         | 0.03         | 0.11 | 0.00 | 0.13 | 0.04 | 0.07 | 0.00 | 0.00 | 0.07 | 0.00 | 0.03 | 0.01 | 0.01 | 0.01 | 0.22 | 0.00 | 0.00 | 0.00 | 0.00 | 0.00 | 0.00 |  |
| Greenland       | 0.03         | 0.00 | 0.00 | 0.22 | 0.01 | 0.01 | 0.00 | 0.00 | 0.13 | 0.09 | 0.00 | 0.00 | 0.00 | 0.19 | 0.00 | 0.00 | 0.00 | 0.00 | 0.00 | 0.00 | 0.00 |  |
| Hawikuh         | 0.00         | 0.00 | 0.01 | 0.00 | 0.12 | 0.00 | 0.00 | 0.10 | 0.00 | 0.00 | 0.10 | 0.00 | 0.00 | 0.06 | 0.20 | 0.00 | 0.00 | 0.00 | 0.00 | 0.00 | 0.00 |  |
| Ibo             | 0.08         | 0.01 | 0.00 | 0.04 | 0.02 | 0.18 | 0.05 | 0.04 | 0.00 | 0.00 | 0.06 | 0.01 | 0.00 | 0.02 | 0.00 | 0.01 | 0.00 | 0.00 | 0.00 | 0.00 | 0.00 |  |
| Italian         | 0.10         | 0.03 | 0.03 | 0.04 | 0.06 | 0.03 | 0.09 | 0.04 | 0.02 | 0.01 | 0.17 | 0.01 | 0.01 | 0.01 | 0.03 | 0.00 | 0.03 | 0.01 | 0.02 | 0.01 | 0.00 |  |
| Japanese        | 0.07         | 0.02 | 0.02 | 0.00 | 0.00 | 0.00 | 0.00 | 0.00 | 0.00 | 0.00 | 0.00 | 0.00 | 0.00 | 0.00 | 0.22 | 0.00 | 0.00 | 0.00 | 0.00 | 0.00 | 0.00 |  |
| Mongolian       | 0.07         | 0.04 | 0.00 | 0.06 | 0.00 | 0.11 | 0.02 | 0.05 | 0.02 | 0.00 | 0.07 | 0.00 | 0.00 | 0.00 | 0.24 | 0.00 | 0.00 | 0.00 | 0.00 | 0.00 | 0.00 |  |
| Central African | 0.10         | 0.01 | 0.02 | 0.00 | 0.05 | 0.08 | 0.02 | 0.01 | 0.01 | 0.00 | 0.05 | 0.03 | 0.00 | 0.05 | 0.04 | 0.00 | 0.00 | 0.00 | 0.00 | 0.00 | 0.00 |  |
| San             | 0.07         | 0.02 | 0.00 | 0.10 | 0.03 | 0.22 | 0.06 | 0.00 | 0.02 | 0.00 | 0.02 | 0.00 | 0.00 | 0.00 | 0.12 | 0.00 | 0.00 | 0.00 | 0.00 | 0.00 | 0.00 |  |

  

| Loci            | <i>HP†</i> |      | <i>IGHG1G3†</i> |             | <i>KEL</i> | <i>KM</i> | <i>MN†</i> |          | <i>P</i>  | <i>PGD†</i> |          | <i>PGM1</i> | <i>RH</i>  |            |            |            |            |            |            |            |  |
|-----------------|------------|------|-----------------|-------------|------------|-----------|------------|----------|-----------|-------------|----------|-------------|------------|------------|------------|------------|------------|------------|------------|------------|--|
|                 | 1          | 2    | <i>za;g</i>     | <i>zaxg</i> | <i>K</i>   | 1         | <i>M</i>   | <i>N</i> | <i>P1</i> | <i>A</i>    | <i>C</i> | 1           | <i>CDE</i> |  |
| Australian      | 0.31       | 0.69 | 0.86            | 0.03        | 0.00       | 0.32      | 0.84       | 0.16     | 0.17      | 1.00        | 0.00     | 0.85        | 0.00       | 0.45       | 0.00       | 0.00       | 0.53       | 0.02       | 0.00       | 0.00       |  |
| Alaskan         | 0.23       | 0.77 | 0.71            | 0.25        | 0.00       | 0.21      | 0.26       | 0.75     | 0.25      | 0.96        | 0.04     | 0.90        | 0.06       | 0.61       | 0.00       | 0.01       | 0.24       | 0.08       | 0.00       | 0.00       |  |
| Chinese         | 0.27       | 0.73 | 0.40            | 0.17        | 0.00       | 0.34      | 0.56       | 0.45     | 0.06      | 0.94        | 0.06     | 0.77        | 0.01       | 0.74       | 0.00       | 0.02       | 0.17       | 0.02       | 0.00       | 0.05       |  |
| Greenland       | 0.35       | 0.65 | 0.76            | 0.01        | 0.00       | 0.19      | 0.76       | 0.24     | 0.14      | 0.99        | 0.01     | 0.66        | 0.01       | 0.65       | 0.00       | 0.00       | 0.29       | 0.03       | 0.00       | 0.02       |  |
| Hawikuh         | 0.54       | 0.47 | 0.91            | 0.06        | 0.00       | 0.34      | 0.70       | 0.30     | 0.54      | 1.00        | 0.00     | 0.83        | 0.03       | 0.55       | 0.00       | 0.00       | 0.35       | 0.08       | 0.00       | 0.00       |  |
| Ibo             | 0.68       | 0.32 | 0.00            | 0.00        | 0.01       | 0.37      | 0.47       | 0.53     | 0.76      | 0.95        | 0.06     | 0.76        | 0.01       | 0.07       | 0.00       | 0.03       | 0.07       | 0.60       | 0.00       | 0.23       |  |
| Italian         | 0.37       | 0.63 | 0.15            | 0.04        | 0.04       | 0.09      | 0.56       | 0.45     | 0.51      | 0.98        | 0.02     | 0.72        | 0.00       | 0.46       | 0.01       | 0.03       | 0.12       | 0.03       | 0.01       | 0.36       |  |
| Japanese        | 0.21       | 0.79 | 0.55            | 0.17        | 0.05       | 0.31      | 0.53       | 0.47     | 0.17      | 0.92        | 0.08     | 0.82        | 0.05       | 0.57       | 0.00       | 0.05       | 0.11       | 0.05       | 0.05       | 0.12       |  |
| Mongolian       | 0.27       | 0.73 | 0.43            | 0.10        | 0.00       | 0.07      | 0.55       | 0.45     | 0.19      | 0.88        | 0.12     | 0.76        | 0.03       | 0.54       | 0.00       | 0.00       | 0.20       | 0.11       | 0.00       | 0.13       |  |
| Central African | 0.37       | 0.64 | 0.00            | 0.00        | 0.02       | 0.36      | 0.56       | 0.45     | 0.77      | 0.99        | 0.01     | 0.85        | 0.00       | 0.01       | 0.00       | 0.03       | 0.01       | 0.83       | 0.00       | 0.12       |  |
| San             | 0.32       | 0.68 | 0.14            | 0.00        | 0.05       | 0.37      | 0.56       | 0.44     | 0.79      | 1.00        | 0.00     | 0.94        | 0.00       | 0.06       | 0.00       | 0.00       | 0.02       | 0.86       | 0.00       | 0.07       |  |

\*Data collated from Cavalli-Sforza et al. (1).

†In the case of biallelic markers, only one allele frequency was used to generate the genetic distance matrix.

1. Cavalli-Sforza LL, Menozzi P, Piazza A (1994) *The History and Geography of Human Genes* (Princeton Univ Press, Princeton).

**Table S2. Anatomical descriptions of all landmarks used**

| Landmark                  | Anatomical definition                                                                                           | Source | Configuration |
|---------------------------|-----------------------------------------------------------------------------------------------------------------|--------|---------------|
| <b>Cranial unilateral</b> |                                                                                                                 |        |               |
| Alveolon                  | Point where the interpalatal suture intersects the line joining the posterior margins of the alveolar process   | (1)    | P             |
| Basion                    | Point where the anterior margin of the foramen magnum intersects the midsagittal plane                          | (1)    | C             |
| Bregma                    | Point where the coronal and sagittal sutures intersect                                                          | (1)    | V             |
| Glabella                  | Most anterior midline point on the frontal bone                                                                 | (1)    | V             |
| Hormion                   | Point of attachment of the vomer and sphenoid bones                                                             | (1)    | C             |
| Incisivon                 | Most posterior inferior point on the incisive fossa                                                             |        | P             |
| Inion                     | Point where the superior nuchal lines merge in the external occipital protuberance                              | (1)    | C, V          |
| Lambda                    | Point where the sagittal and lambdoid sutures intersect.                                                        | (1)    | V             |
| Metopion                  | Point where the frontal elevation above the chord from nasion-bregma is greatest                                | (1)    | V             |
| Nasion                    | Point of intersection of the nasofrontal suture and the midsagittal plane.                                      | (1)    |               |
| Opisthion                 | Point where the posterior margin of the foramen magnum intersects the midsagittal plane                         | (1)    | C             |
| Opisthocranium            | Most posterior midline point, which lies at the farthest chord length from glabella                             | (1)    | V             |
| Orale                     | Point of intersection on the palate with a line tangent to the posterior margins of the central incisor alveoli | (1)    | P             |
| Palatomaxillare           | Point of intersection of the palatine and the maxillary bones                                                   | (2)    | P             |
| Parietal subtense         | Where the sagittal elevation above the chord from bregma-lambda is greatest                                     | (3)*   | V             |
| Prosthion                 | Most anterior point on the maxillary alveolar process between the two central incisors                          | (1)    | P             |
| Sphenobasion              | Midline point on the sphenoccipital suture                                                                      | (1)    | C             |
| Staphylon                 | Point where the interpalatal suture intersects a line joining the deepest indentation of the posterior palate   | (1)    | P             |
| Subspinale                | Point at which the inferior edge of the nasal spine becomes the anterior edge of the maxilla                    | (1)    | P             |
| <b>Cranial bilateral</b>  |                                                                                                                 |        |               |
| Alare                     | Most lateral point on the nasal aperture taken perpendicular to the nasal height                                | (4)    |               |
| Alveolare                 | Most anterior point on the alveolus of the first molar                                                          | (3)*   | P             |
| Asterion                  | Point where the lambdoid, parietomastoid, and occipitomastoid sutures meet                                      | (1)    | C, V          |
| C/P3                      | Most inferior external point between the maxillary canine and the first premolar                                | (2)    | P             |
| Carotid canal (lat)       | Most lateral point on the carotid canal                                                                         |        | C             |
| Carotid canal (med)       | Most medial point on the carotid canal                                                                          |        | C             |
| Coronale                  | Most lateral point on the coronal suture                                                                        | (1)    | V             |
| Cheek height (sup)        | Point on the inferior orbital rim that represents the endpoint of minimum cheek height                          | (3)*   | Z             |
| Cheek height (inf)        | Point on the inferior border of the zygomatic that represents the end point of minimum cheek height             | (3)*   | Z             |
| Dacryon                   | Point of intersection of the frontolacrimal and lacrimomaxillary sutures                                        | (1)    |               |
| Ectoconchion              | Most lateral point on the orbital margin                                                                        | (1)    | Z             |
| Ectomolare                | Most lateral point on the outer surface of the alveolar margin of the maxilla                                   | (1)    | P             |
| External aud meatus (ant) | Most anterior point on the margin of the external auditory meatus                                               |        | V             |
| External aud meatus (inf) | Most inferior point on the margin of the external auditory meatus                                               | (2)    | V             |
| External aud meatus (pos) | Most posterior point on the margin of the external auditory meatus                                              |        | V             |
| External palate length    | Point on the inferior surface of the maxilla that denotes the most posterior point of the alveolar process      | (2)    | P             |
| Foramen magnum (lat)      | Most lateral point on the margin of the foramen magnum                                                          | (2)    | C             |
| Foramen ovale (ant)       | Most anterior point on the foramen ovale                                                                        |        | V             |
| Foramen ovale (pos)       | Most posterior point on the foramen ovale                                                                       |        | V             |
| FRED                      | Point of intersection of the frontozygomatic, zygomaticosphenoid, and sphenofrontal sutures                     |        | V, Z          |
| Frontomalare orbitale     | Point where the zygomaticofrontal suture crosses the orbital margin                                             | (1)    | Z             |
| Frontomalare temporale    | Most lateral point on the zygomaticofrontal suture                                                              | (1)    | Z             |
| Frontotemporale           | Point on the frontal bone where the temporal line reaches its most anteromedial position                        | (1)    | V, TL         |

Table S2. Cont.

| Landmark                | Anatomical definition                                                                                       | Source           | Configuration |
|-------------------------|-------------------------------------------------------------------------------------------------------------|------------------|---------------|
| Hormion (lat)           | Most posterior point on the ala of the vomer                                                                |                  | C             |
| Hypoglossal foramen     | Most superior, anterior point on the edge of the hypoglossal canal                                          |                  | C             |
| Infranasion             | Point of intersection of the nasofrontal, nasomaxillary, and maxillofrontal sutures                         | (1)              |               |
| Jugale                  | Point in the notch between the temporal and frontal processes of the zygomatic bone                         | (1)              | Z             |
| Jugular (lat)           | Most inferior, lateral point on the margin of the jugular foramen                                           | (5)              | C             |
| Jugular (med)           | Most inferior, medial point on the margin of the jugular foramen                                            |                  | C             |
| Krotaphion              | Most posterior extent of the sphenoparietal suture                                                          | (1)              | V             |
| Mandibular fossa (lat)  | Most lateral point on the mandibular fossa                                                                  | (5)*             | V, Z          |
| Mastoideale             | Most inferior, lateral point on the mastoid process                                                         | (1)              | C             |
| Mastoideale (ant)       | Anterior point of intersection of the mastoid process and the external tympanic plate                       | (3)*             | C             |
| Mastoideale (pos)       | Posterior point of intersection of the mastoid process and the digastric groove                             | (3)*             | C             |
| Mastoideale (sup)       | Most superior, lateral point on the mastoid process (on the FH)                                             | (3) <sup>a</sup> | C, V          |
| Maximum maxillary curve | Point in the depth of the notch between the zygomaxillary suture and the alveolar process                   | (2)              | P             |
| Molars (pos)            | Most inferior, posterior point on the external maxillary alveolus (pos to third molars)                     | (2)              | P             |
| Nariale                 | Most inferior point on the lower rim of the nasal aperture                                                  | (3)*, (6)        |               |
| Nasomaxillare           | Most inferior point on the nasomaxillary suture                                                             | (2)              |               |
| Occipitocondyle (ant)   | Most anterior, inferior point on the occipital condyle                                                      |                  | C             |
| Occipitocondyle (lat)   | Most lateral, inferior point on the occipital condyle                                                       |                  | C             |
| Orbitale                | Most inferior midpoint on the orbital margin                                                                | (1)              | Z             |
| Orbitale (sup)          | Most superior midpoint of the orbital margin                                                                |                  |               |
| Palatomaxillare (lat)   | Most lateral point on the palate-maxillary suture                                                           | (2)              | P             |
| Petrosal                | Most anterior point of the petrous element of the temporal bone                                             | (5)*             | C             |
| Porion                  | Most superior point on the margin of the external auditory meatus                                           | (1)              | V             |
| Radiculare              | Point of maximum inflection of the zygomatic processes                                                      | (1)              | V, Z          |
| Sphenion                | Most anterior extent of the sphenoparietal suture                                                           | (1)              | V             |
| Sphenobasion (lat)      | Most lateral, inferior point on the sphenoccipital synchondrosis                                            | (2)              | C             |
| Sphenomaxillare (sup)   | Most superior, lateral point of contact between the maxilla and the lateral pterygoid plate of the sphenoid |                  | V             |
| Sphenosquamosal         | Point of intersection of the infratemporal crest and sphenosquamosal suture                                 | (5)              | V, Z          |
| Sphenozygomatic (pos)   | Most posterior, inferior point on the sphenozygomatic suture                                                |                  | V, Z          |
| Squamous (inf TL)       | Point of intersection of the squamous suture and the inferior temporal line                                 |                  | TL            |
| Squamous (sup TL)       | Point of intersection of the squamous suture and the superior temporal line                                 |                  | TL            |
| Stenion                 | Most medial point on the sphenosquamosal sutures                                                            | (1)              | V, Z          |
| Stephanion              | Point where the coronal suture crosses the (inferior) temporal line                                         | (1)              | V             |
| Styloid foramen         | Most anterior, inferior point on the styloid foramen                                                        |                  | C             |
| Temporal fossa (ant)    | Most anterior, inferior point on the temporal fossa                                                         | (2)              | Z             |
| Temporal fossa (lat)    | Most lateral, inferior point on the temporal fossa                                                          | (2)*             | Z             |
| Temporal fossa (pos)    | Most posterior, inferior point on the temporal fossa                                                        | (2)              | Z             |
| Zygion                  | Most lateral point on the surface of the zygomatic arch                                                     | (1)              | Z             |
| Zygomaxillare           | Most inferior, anterior point on the zygomaticomaxillary suture                                             | (1)              | Z             |
| Zygoorbitale            | Point where the zygomaticomaxillary suture intersects with the inferior orbital margin                      | (3)              | Z             |
| Zygomatic tuberosity    | Most lateral, anteriorly projecting point on the zygomatic bone                                             | (2)              | Z             |
| Zygotemporale (inf)     | Most inferior point on the zygomaticotemporal suture                                                        | (3)*             | V, Z          |
| Zygotemporale (sup)     | Most superior point on the zygomaticotemporal suture                                                        |                  | V, Z          |

ant, anterior; C, chondrocranium; FH, Frankfurt horizon; inf, inferior; lat, lateral; med, medial; P, palatomaxilla; pos, posterior; sup, superior; TL, temporal lines; V, vault; Z, zygotemporal.

\*Adapted from original source.

- Martin R, Saller K (1957) *Lehrbuch der Anthropologie in Systematischer Darstellung* (Gustav Fischer, Stuttgart).
- Lahr MM (1992) The origins of modern humans: A test of the multiregional hypothesis, PhD thesis (Univ of Cambridge, Cambridge, UK).
- Howells WW (1973) *Cranial Variation in Man: A Study by Multivariate Analysis of Patterns of Difference Among Recent Human Populations* (Harvard Univ Press, Cambridge, MA).
- Bass WM (1995) *Human Osteology: A Laboratory and Field Manual* (Missouri Archaeological Society, Columbia, MO).
- Lockwood CA, Kimbel WH, Lynch JM (2004) Morphometrics and hominoid phylogeny: Support for a chimpanzee-human clade and differentiation among great ape subspecies. *Proc Natl Acad Sci USA* 101:4356–4360.
- Grine FE, et al. (2007) Late Pleistocene human skull from Hofmeyr, South Africa, and modern human origins. *Science* 315:226–229.

**Table S3. Climatic variables used to construct climatic distance matrices for 11 populations\***

|                 | miTemp | mxTemp | mnTemp | miPrecip | mxPrecip | mnPrecip | miVP  | mxVP  | mnVP  | miCloud | mxCloud | mnCloud |
|-----------------|--------|--------|--------|----------|----------|----------|-------|-------|-------|---------|---------|---------|
| Alaskan         | -27.20 | 5.70   | -11.67 | 0.08     | 0.85     | 0.29     | 0.41  | 8.30  | 3.21  | 55.50   | 82.60   | 71.28   |
| Australian      | 17.10  | 31.70  | 25.61  | 0.02     | 3.00     | 0.87     | 8.00  | 20.50 | 13.43 | 18.20   | 53.60   | 33.58   |
| Chinese         | 1.10   | 27.50  | 14.88  | 0.40     | 6.50     | 2.23     | 4.20  | 29.40 | 14.13 | 43.20   | 69.80   | 57.29   |
| Greenland       | -21.80 | 2.30   | -10.61 | 0.50     | 1.30     | 0.88     | 0.80  | 5.90  | 2.67  | 53.10   | 70.70   | 63.49   |
| Hawikuh         | 0.80   | 21.60  | 10.78  | 0.30     | 2.30     | 0.92     | 3.40  | 12.80 | 6.19  | 31.30   | 49.40   | 42.67   |
| Ibo             | 25.00  | 29.70  | 26.93  | 0.04     | 7.70     | 3.64     | 14.70 | 27.50 | 23.33 | 51.50   | 88.30   | 68.70   |
| Italian         | -3.60  | 14.00  | 5.21   | 2.96     | 4.52     | 3.61     | 3.99  | 13.09 | 8.09  | 51.10   | 65.20   | 59.07   |
| Japanese        | -1.10  | 24.50  | 10.98  | 2.67     | 5.68     | 4.07     | 4.42  | 23.40 | 11.40 | 66.90   | 80.60   | 73.21   |
| Mongolian       | -20.50 | 20.50  | 1.24   | 0.00     | 1.83     | 0.49     | 0.99  | 13.72 | 5.40  | 24.70   | 40.40   | 32.25   |
| Central African | 24.10  | 27.60  | 25.40  | 0.11     | 7.85     | 3.72     | 15.70 | 25.40 | 22.36 | 26.60   | 65.00   | 44.08   |
| San             | 16.10  | 26.20  | 22.48  | 0.00     | 4.40     | 1.40     | 11.30 | 24.60 | 17.79 | 22.40   | 64.30   | 43.78   |

Cloud, cloud cover (%); mi, minimum; mn, mean; mx, maximum; Precip, precipitation (mm/d); Temp, temperature (°C); VP, vapor pressure (hPa).  
\*Data from New et al. (1, 2).

1. New M, Hulme M, Jones P (1999) Representing twentieth-century space-time climate variability. Part I: Development of a 1961-90 mean monthly terrestrial climatology. *J Clim* 12: 829–856.
2. New M, Lister D, Hulme M, Makin I (2002) A high-resolution data set of surface climate over global land areas. *Clim Res* 21:1–25.

**Table S4. Number of landmarks used to quantify the shape of each morphological unit, plus numbers of PC scores used to generate population D-matrices**

| Morphological units | No. landmarks | No. PC scores |
|---------------------|---------------|---------------|
| Entire cranium      | 151           | 123           |
| Vault               | 51            | 47            |
| Chondrocranium      | 39            | 61            |
| Palatomaxilla       | 21            | 36            |
| Zygotemporal        | 22            | 37            |
| Temporal lines      | 25            | 15            |
| Mandible            | 33            | 42            |
